# Supplementary material for: Pervasive and opposing effects of Unpredictable Chronic Mild Stress (UCMS) on hippocampal gene expression in BALB/cJ and C57BL/6J mouse strains
Source: PubMed Central journal article supplement (PMC4412144; doi:10.1186/s12864-015-1431-6), 2015-04-03

Gene dendrogram and module colors (A1)

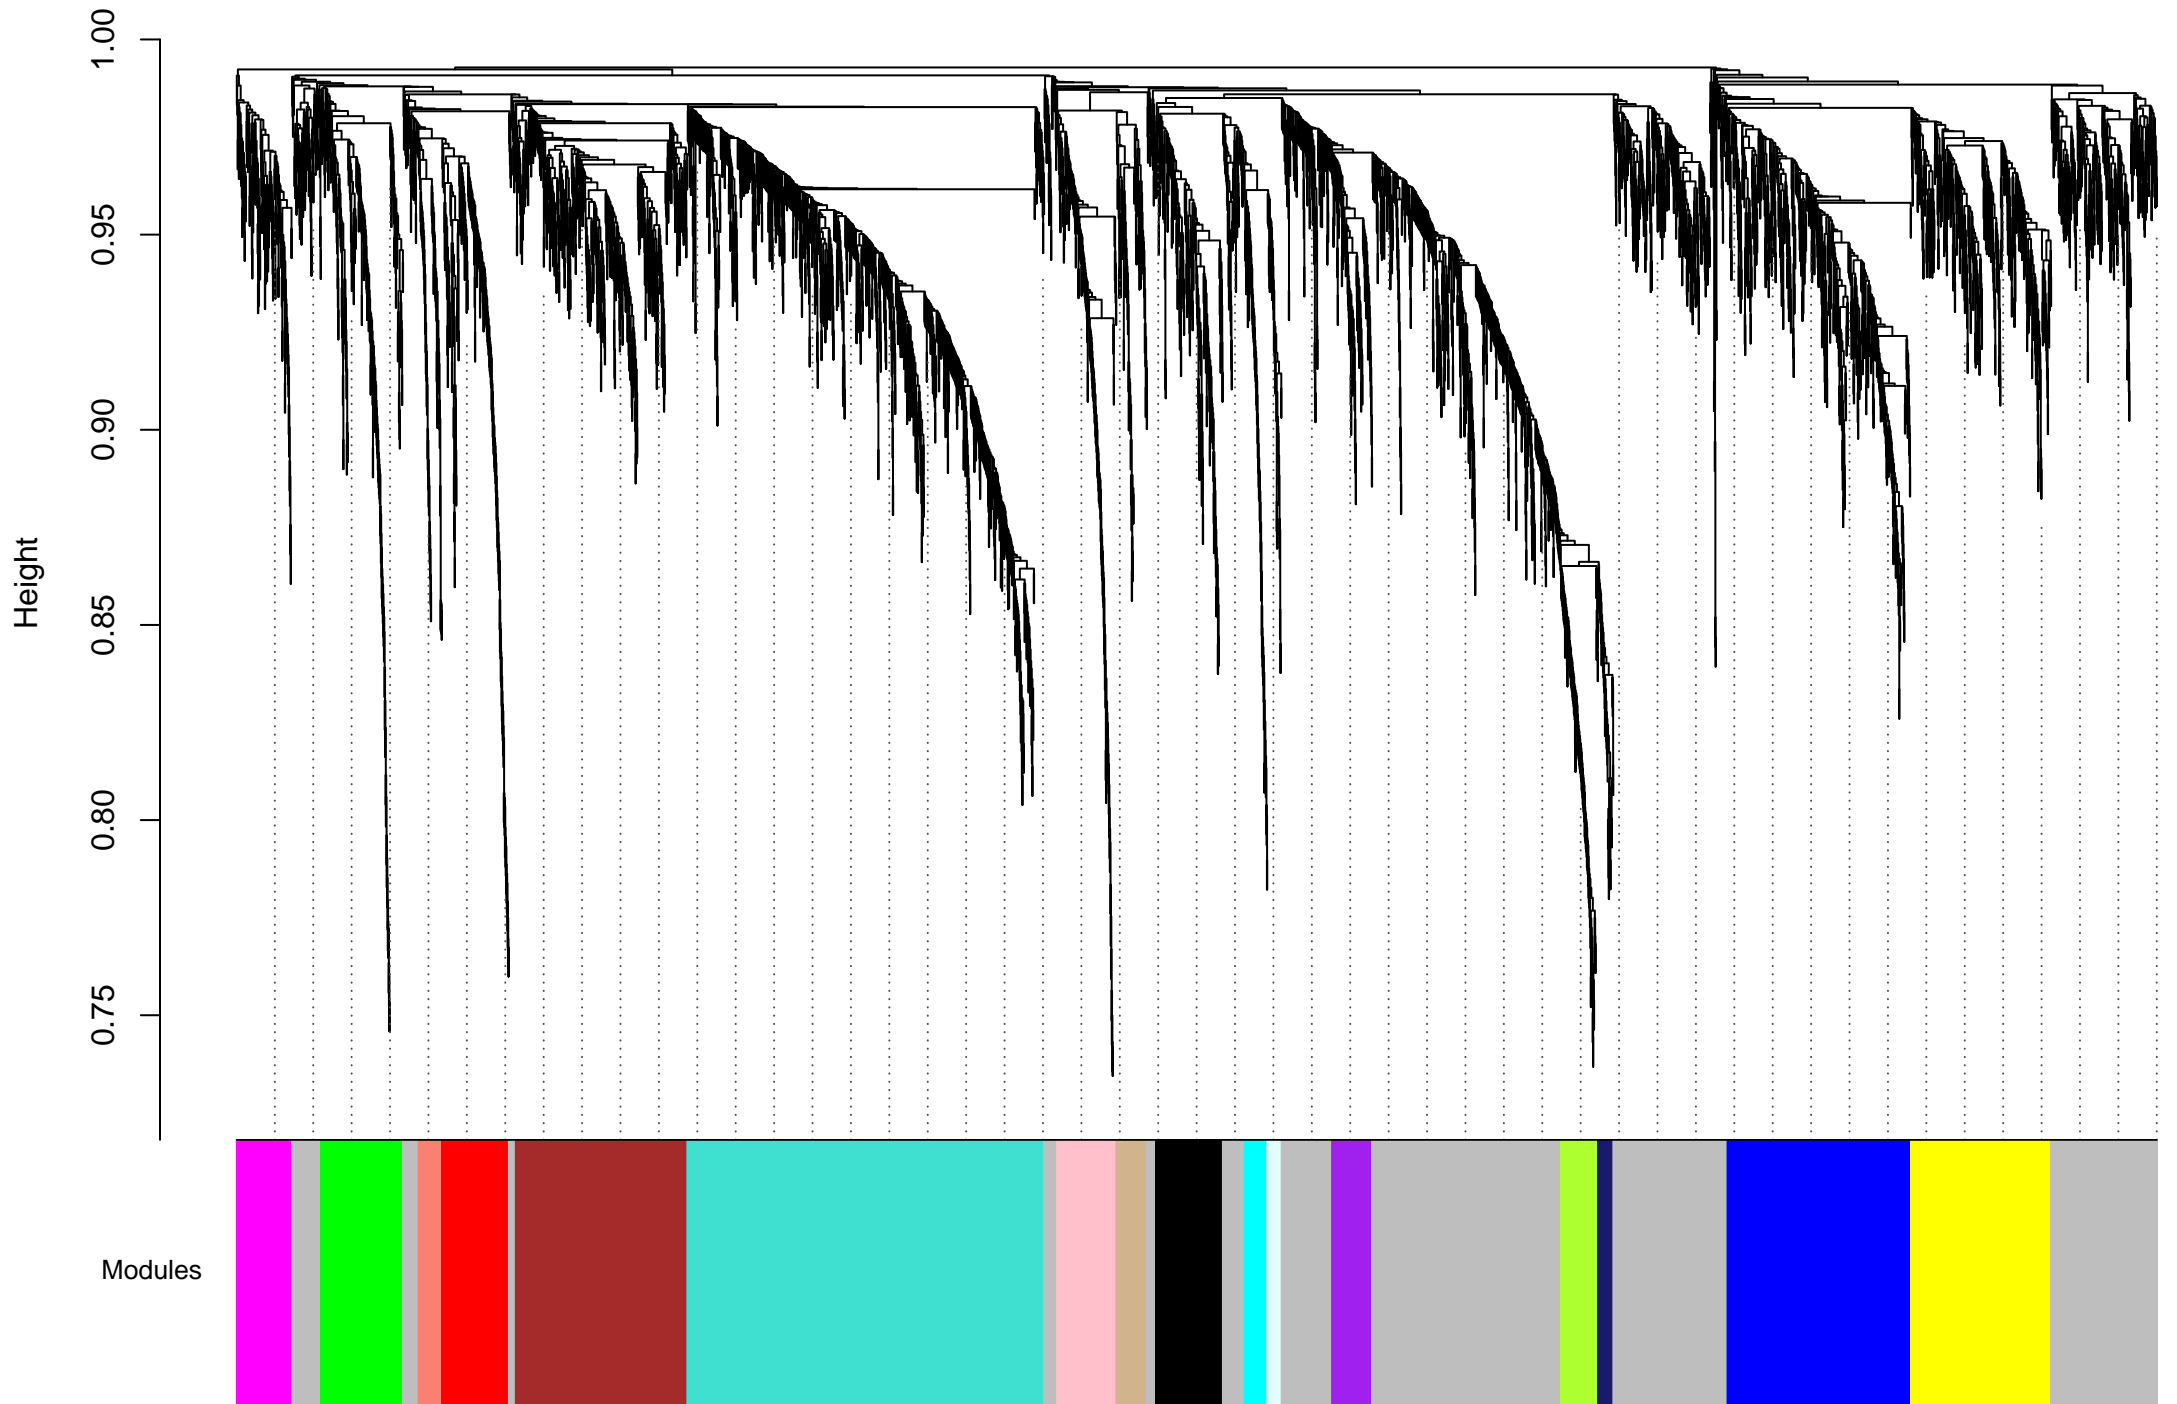

Gene dendrogram and module colors (A2)

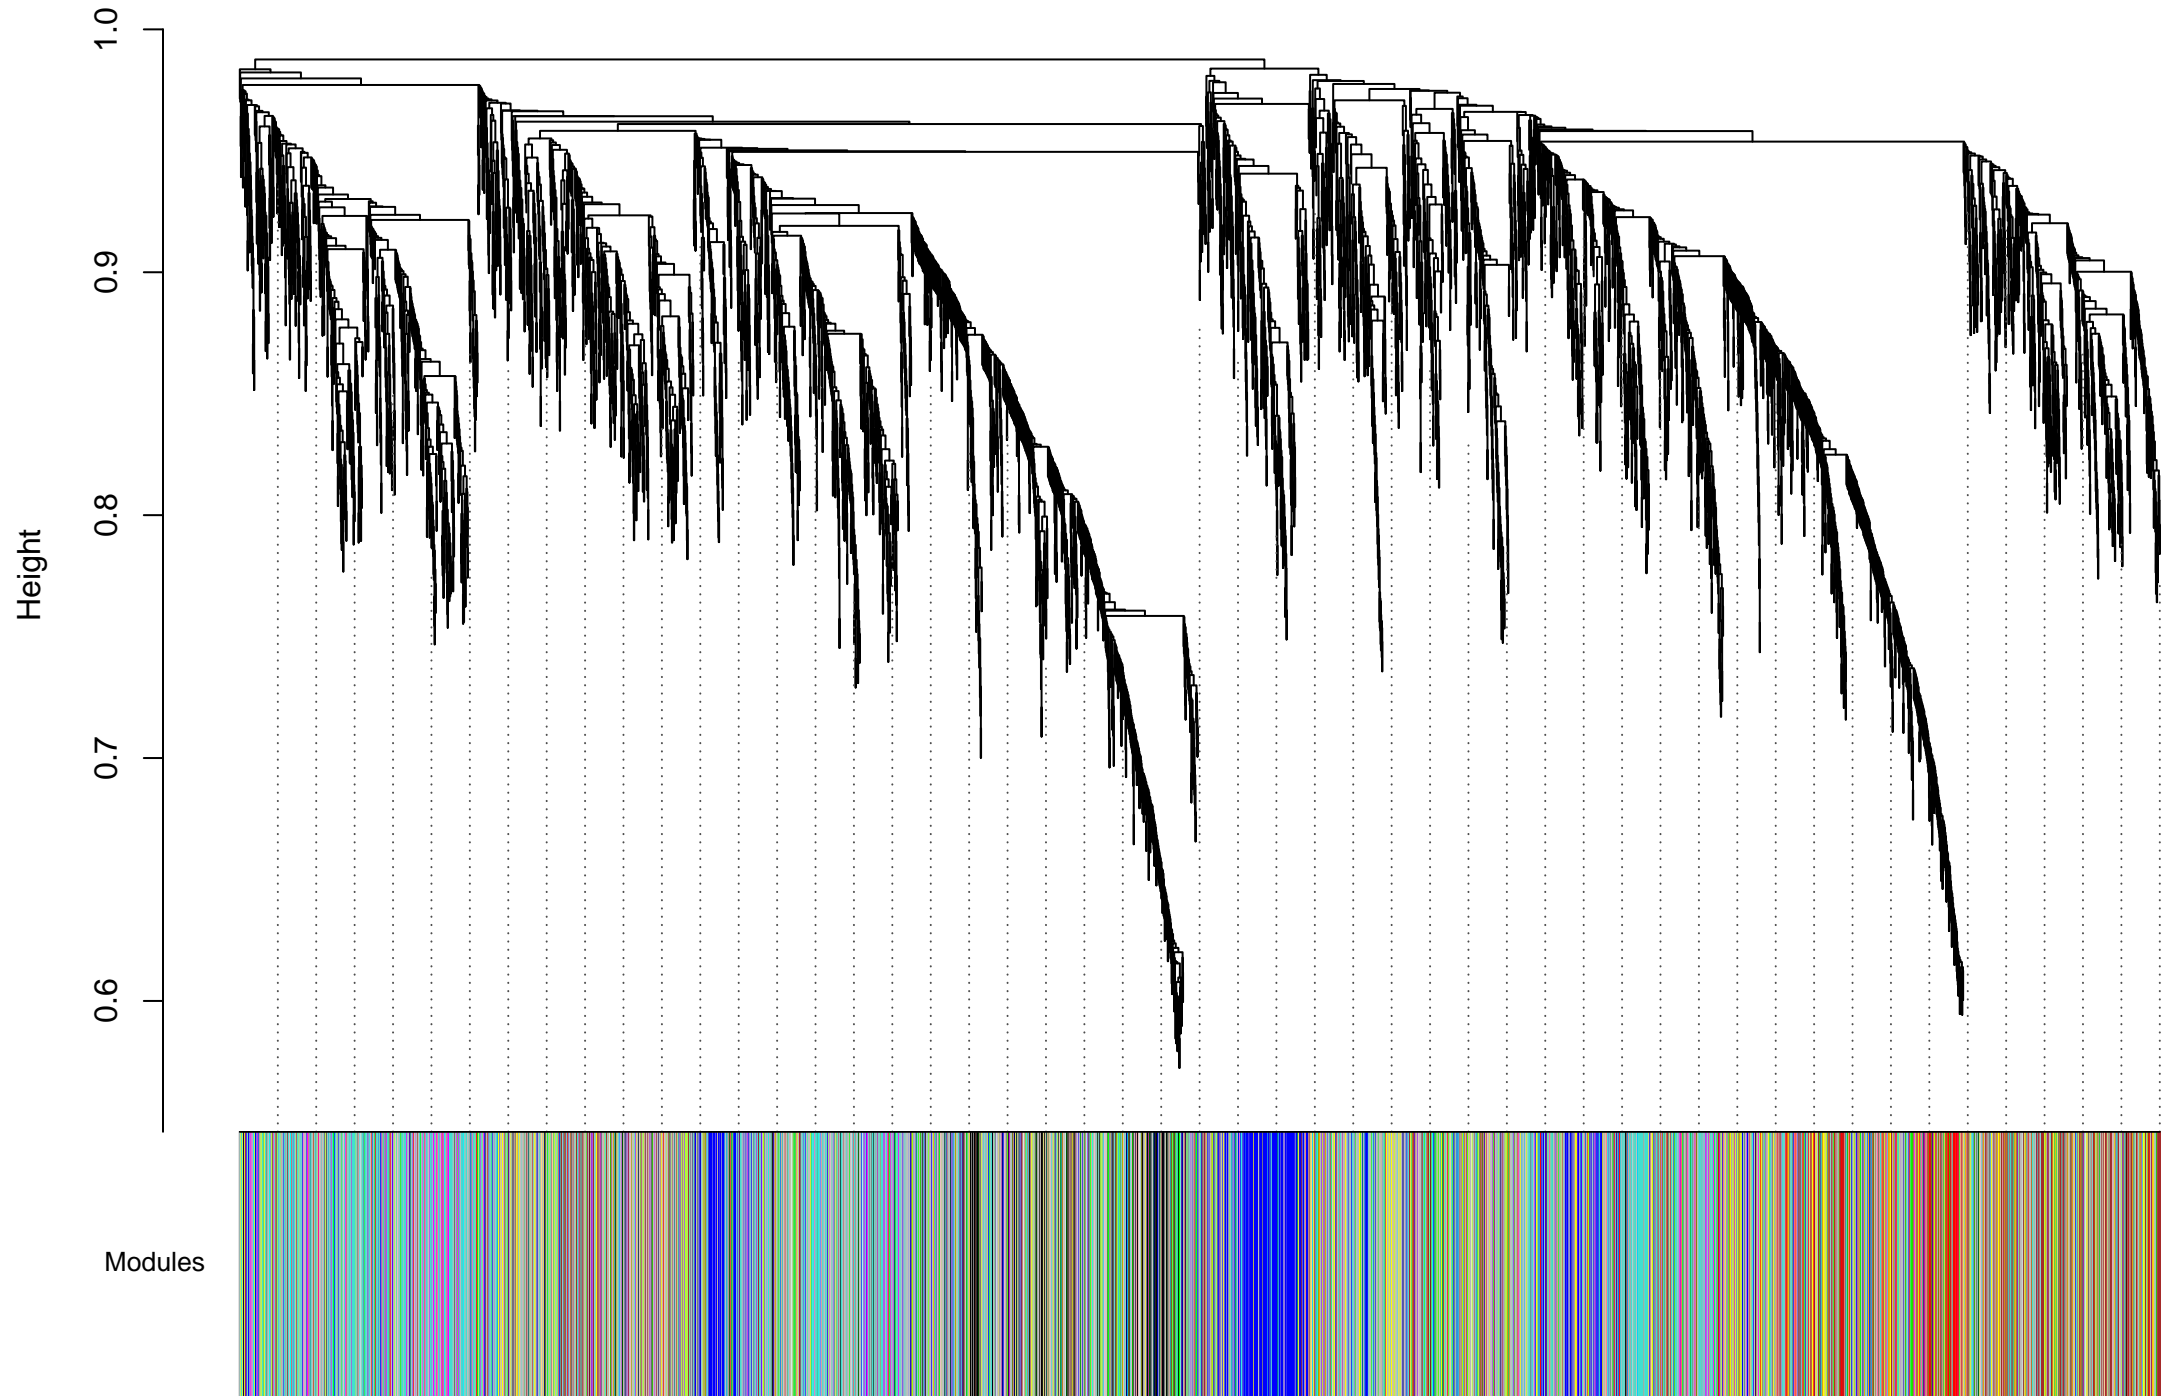

Supplement: 12864_2015_1431_MOESM2_ESM.pdf [file 12864_2015_1431_MOESM2_ESM.pdf]
